# Supplementary material for: Ellipsoid Localization Microscopy Infers the Size and Order of Protein Layers in Bacillus Spore Coats
Source: PubMed Central journal article supplement (PMC4656864; doi:10.1016/j.bpj.2015.09.023), 2015-11-17
Supplement: mmc1.pdf [file mmc1.pdf]

**Biophysical Journal**

**Supporting Material**

**Ellipsoid Localization Microscopy Infers the Size and Order of Protein Layers in *Bacillus* Spore Coats**

Julia Manetsberger,<sup>1</sup> James D. Manton,<sup>1</sup> Miklos J. Erdelyi,<sup>2</sup> Henry Lin,<sup>1</sup> David Rees, Graham Christie,<sup>1</sup> and Eric J. Rees<sup>1,\*</sup>

<sup>1</sup>Department of Chemical Engineering and Biotechnology, University of Cambridge, Cambridge, United Kingdom; and <sup>2</sup>Department of Optics and Quantum Electronics, University of Szeged, Szeged, Hungary

## Supporting Information 1

**Table S1 Bacterial strains used in this study**

| Strain                       | Relevant genotype <sup>a</sup>                       | Source/reference                     |
|------------------------------|------------------------------------------------------|--------------------------------------|
| <i>B. megaterium</i> strains |                                                      |                                      |
| QM B1551                     | Wild-type strain                                     | P.S. Vary                            |
| GFP fusion strains           |                                                      |                                      |
| JM100                        | BMQ_0737::pVLG6 ( <i>gfp</i> ) Cm <sup>r</sup>       | 1                                    |
| JM101                        | BMQ_3035::pVLG6 ( <i>gfp</i> ) Cm <sup>r</sup>       | 1                                    |
| JM102                        | BMQ_4051::pVLG6 ( <i>gfp</i> ) Cm <sup>r</sup>       | 1                                    |
| JM103                        | <i>cotE</i> ::pVLG6 ( <i>gfp</i> ) Cm <sup>r</sup>   | 1                                    |
| JM104                        | pHT- <i>cotX1-gfp</i> MLS <sup>r</sup>               | This study                           |
| JM105                        | pHT- <i>cotX2-gfp</i> MLS <sup>r</sup>               | This study                           |
| FIU104                       | <i>sleL</i> ::pVLG6 ( <i>gfp</i> ) Cm <sup>r</sup>   | 2                                    |
| <i>B. subtilis</i> strains   |                                                      |                                      |
| 168 1A1                      | Wild-type strain <i>TrpC2</i>                        | <i>Bacillus</i> Genetic Stock Centre |
| HL100                        | <i>TrpC2 amyE</i> :: <i>sleL-gfp</i> Cm <sup>r</sup> | This study                           |
| HL101                        | <i>TrpC2 amyE</i> :: <i>cotG-gfp</i> Cm <sup>r</sup> | This study                           |
| HL102                        | <i>TrpC2 amyE</i> :: <i>cotZ-gfp</i> Cm <sup>r</sup> | This study                           |

<sup>a</sup> Abbreviations for antibiotics: Cm<sup>r</sup>, chloramphenicol resistance (5 µg/ml); MLS<sup>r</sup>, lincomycin (25 µg/ml) and erythromycin (1 µg/ml).

### References

1. Manetsberger, J., Hall, E. A., and Christie, G. (2014) BMQ\_0737 encodes a novel protein crucial to the integrity of the outermost layers of *Bacillus megaterium* QM B1551 spores. *FEMS microbiology letters* **358**, 162-169.
2. Üstök, F. I., Packman, L. C., Lowe, C. R., and Christie, G. (2014) Spore germination mediated by *Bacillus megaterium* QM B1551 SleL and YpeB. *Journal of bacteriology* **196**, 1045-1054.

## Supporting Information 2

Image analysis software for the paper:

**Ellipsoid localisation microscopy infers the size and order of protein layers in *Bacillus* spore coats**

### Software Authors

J.D. Manton<sup>1</sup>, E.J. Rees<sup>1\*</sup>

<sup>1</sup> Department of Chemical Engineering and Biotechnology, University of Cambridge, CB2 3RA, UK.

\* Correspondence [ejr36@cam.ac.uk](mailto:ejr36@cam.ac.uk)

This software is open source, and can be obtained from the following website (or alternatively by contacting Eric Rees with the correspondence address above). This source may be updated from time to time.

<http://laser.ceb.cam.ac.uk/research/our-software>

A version of the software from the time of publication is archived at [data.cam.ac.uk/](http://data.cam.ac.uk/)

LINK: <https://www.repository.cam.ac.uk/handle/1810/251135>

reference ID: [opendata #2026] at [info@data.cam.ac.uk](mailto:info@data.cam.ac.uk)

Supporting Information 3: Model leading to equation 4 (spherical shell image)

Algebraic model for image of a spherical spore shell

EJR/HDR.

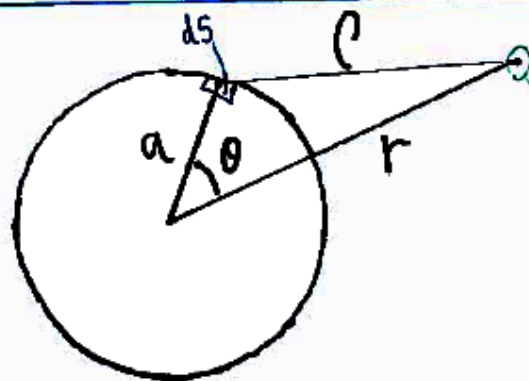

$f(r)$  = Image brightness at this point  
 $\rho$  = Distance to area element  $dS$   
 $a$  = Spherical shell radius.

(1)  $\rho^2 = r^2 + a^2 - 2ar \cos \theta$ . (Cosine rule)

(2)  $df = (I_0 dS) \times \frac{e^{-\rho^2/2\sigma^2}}{(2\pi\sigma^2)}$

CONTRIBUTION TO IMAGE INTENSITY  $f(r)$       FLORESCENCE EMITTED FROM AREA ELEMENT  $dS$       SPHERICALLY SYMMETRIC GAUSSIAN POINT SPREAD FUNCTION (NORMALISED)

(Integrate)  $f(r) = \left(\frac{I_0}{2\pi\sigma^2}\right) \int_0^{2\pi} d\phi \int_0^\pi a^2 \sin\theta d\theta e^{-(r^2+a^2-2ar\cos\theta)/2\sigma^2}$

Substitute  $x = \cos\theta$ ,  $\theta = \pi \rightarrow x = -1$   
 $dx = -\sin\theta d\theta$ ,  $\theta = 0 \rightarrow x = 1$

(Substitute)  $\left(\frac{1}{I_0}\right)f(r) = \left(\frac{a^2}{\sigma^2}\right) \int_{-1}^1 e^{-(r^2+a^2)/2\sigma^2} e^{2arx/2\sigma^2} dx$

(Separate)  $= \left(\frac{a^2}{\sigma^2}\right) e^{-(r^2+a^2)/2\sigma^2} \int_{-1}^1 e^{2arx/2\sigma^2} dx$

(Integrate exponential)  $= \left(\frac{a\sigma^2}{r\sigma^4}\right) \cdot e^{-(r^2+a^2)/2\sigma^2} \cdot \left[ e^{2ar/2\sigma^2} - e^{-2ar/2\sigma^2} \right]$

(Difference of two squares)  $f(r) = \left(\frac{aI_0}{r}\right) \left[ e^{-(r-a)^2/2\sigma^2} - e^{-(r+a)^2/2\sigma^2} \right]$

## **Supporting Information 4**

Sample image data from this study is uploaded at [data.cam.ac.uk/](https://data.cam.ac.uk/)

LINK: <https://www.repository.cam.ac.uk/handle/1810/251135>
